# Supplementary material
Source: Springer Nature journal article supplement (https://www.springermedizin.de/resource/supplementary/12879_2013_2975_MOESM3_ESM.pdf/9445892)

Funnel Plot

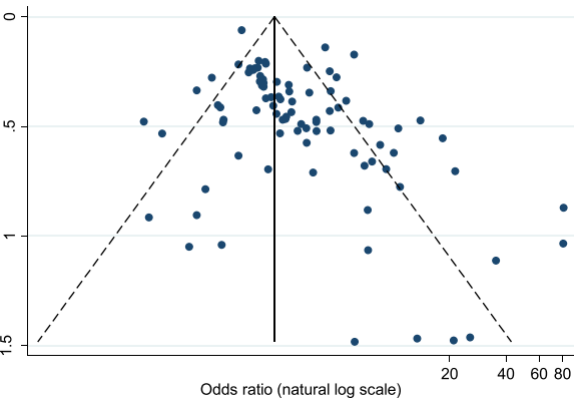

Supplement: MOESM3 [file 9445892]
